# Supplementary material
Source: PubMed Central journal article supplement (PMC6974402)
Supplement: EMS85031-supplement-Supplementary_tables.pdf [file EMS85031-supplement-Supplementary_tables.pdf]

*An. gambiae*

|      | G    |      |      | C    |      |      | A    |      |      | A    |      |      | G    |      |      |
|------|------|------|------|------|------|------|------|------|------|------|------|------|------|------|------|
|      | der  | hets | wt   |
| 2013 | 0.07 | 0.52 | 0.40 | 0.10 | 0.48 | 0.43 | 0.02 | 0.62 | 0.36 | 0.05 | 0.57 | 0.38 | 0.12 | 0.50 | 0.38 |
| 2015 | 0.12 | 0.40 | 0.48 | 0.08 | 0.42 | 0.50 | 0.18 | 0.31 | 0.51 | 0.12 | 0.37 | 0.51 | 0.13 | 0.38 | 0.50 |
| 2018 | 0.10 | 0.45 | 0.45 | 0.10 | 0.43 | 0.48 | 0.10 | 0.58 | 0.33 | 0.10 | 0.45 | 0.45 | 0.10 | 0.53 | 0.38 |

*An. coluzzii*

|      | G    |      |      | C    |      |      | A    |      |      | A    |      |      | G    |      |      |
|------|------|------|------|------|------|------|------|------|------|------|------|------|------|------|------|
|      | der  | hets | wt   |
| 2011 | 0.04 | 0.30 | 0.65 | 0.04 | 0.26 | 0.70 | 0.04 | 0.13 | 0.83 | 0.13 | 0.13 | 0.74 | 0.17 | 0.30 | 0.52 |
| 2012 | 0.10 | 0.39 | 0.51 | 0.09 | 0.39 | 0.52 | 0.07 | 0.42 | 0.51 | 0.09 | 0.42 | 0.49 | 0.12 | 0.51 | 0.38 |
| 2014 | 0.07 | 0.37 | 0.56 | 0.09 | 0.37 | 0.54 | 0.13 | 0.33 | 0.54 | 0.14 | 0.30 | 0.56 | 0.15 | 0.48 | 0.37 |
| 2016 | 0.17 | 0.37 | 0.46 | 0.13 | 0.35 | 0.52 | 0.13 | 0.35 | 0.52 | 0.11 | 0.30 | 0.59 | 0.10 | 0.41 | 0.49 |
| 2018 | 0.24 | 0.44 | 0.32 | 0.18 | 0.39 | 0.42 | 0.12 | 0.59 | 0.29 | 0.18 | 0.36 | 0.45 | 0.31 | 0.47 | 0.22 |

der = derived  
hets = heterozygote  
wt = wild type

**Supplementary Table 1: Sweep frequencies.** Frequencies of derived (swept SNP), heterozygote and wild type SNPs and each locus, for each year for both *An. gambiae* and *An. coluzzii*.

Supplementary Table 2: Graphical Data with corresponding statistics. For each significant result, the p value and mean data are shown for each graphical figure in the paper. Each figure is separated by a bold underline, with the figure the statistics refer to specified above the said line.

**Tiassale vs N'Gouso**

| Transcript | $\Delta\Delta ct_x$ | p-value  |
|------------|---------------------|----------|
| SAP2       | 12.43               | 2.65E-04 |
| CSP6       | 3.79                | 3.16E-02 |

**Tiassale vs Kisumu**

| Transcript | $\Delta\Delta ct_x$ | p-value  |
|------------|---------------------|----------|
| SAP2       | 6.48                | 1.19E-03 |
| CSP1       | 2.56                | 3.64E-02 |
| CSP5       | 4.24                | 1.83E-03 |
| CSP6       | 5580.03             | 1.73E-03 |

Statistics and mean ddCT values used in Extended Data Figure 2

**Tiassale**

|      | Antennae            |         | Head                |         | Legs                |         | Midgut              |         | Malpighian Tubules  |         | Reproductive Tissue |         | Abdomen Carcass     |         |
|------|---------------------|---------|---------------------|---------|---------------------|---------|---------------------|---------|---------------------|---------|---------------------|---------|---------------------|---------|
|      | $\Delta\Delta ct_x$ | p-value |
| SAP1 |                     |         |                     |         | 83.41               | 0.024   | 0.0799              | 0.047   | 0.0365              | <0.001  | 0.087               | <0.001  | 0.184               | <0.001  |
| SAP2 | 0.284               | 0.00813 | 4.1                 | <0.001  | 35.77               | <0.001  | 0.015               | <0.001  |                     |         |                     |         | 0.066               | <0.001  |
| SAP3 |                     |         | 5.03                | 0.00213 | 9.05                | <0.001  | 0.0763              | <0.001  |                     |         |                     |         | 3.49                | 0.00891 |
| CSP1 |                     |         | 5.04                | 0.00191 | 14.24               | <0.001  | 0.301               | 0.00652 | 0.327               | 0.00891 |                     |         | 0.26                | <0.001  |
| CSP3 | 513.86              | <0.001  | 17.85               | <0.001  |                     |         | 0.149               | <0.001  | 0.307               | <0.001  | 0.0978              | <0.001  |                     |         |
| CSP4 |                     |         |                     |         | 42.03               | <0.001  | 0.0787              | <0.001  | 0.05                | 0.0217  | 0.051               | 0.0284  |                     |         |
| CSP5 | 20.28               | <0.001  | 0.039               | <0.001  | 11.74               | <0.001  | 0.0761              | 0.0094  | 0.172               | <0.001  | 0.317               | 0.0049  |                     |         |
| CSP6 |                     |         |                     |         |                     |         |                     |         |                     |         | 3.66                | 0.0153  |                     |         |

**N'Gouso**

|      | Antennae            |         | Head                |         | Legs                |         | Midgut              |         | Malpighian Tubules  |         | Reproductive Tissue |         | Abdomen Carcass     |         |
|------|---------------------|---------|---------------------|---------|---------------------|---------|---------------------|---------|---------------------|---------|---------------------|---------|---------------------|---------|
|      | $\Delta\Delta ct_x$ | p-value |
| SAP1 |                     |         |                     |         | 45.65               | <0.001  | 0.132               | 0.0112  |                     |         |                     |         | 0.15                | 0.0196  |
| SAP2 |                     |         | 6.84                | <0.001  | 53.39               | <0.001  | 0.0333              | <0.001  | 0.151               | 0.0242  | 0.0689              | 0.0027  | 0.737               | <0.001  |
| SAP3 |                     |         | 10.24               | 0.0157  | 19.16               | 0.0016  | 0.0268              | <0.001  | 0.0454              | <0.001  |                     |         | 4.46                | 0.0351  |
| CSP1 |                     |         |                     |         | 1.92                | 0.0447  |                     |         |                     |         |                     |         | 0.0000746           | <0.001  |
| CSP3 | 2701.75             | <0.001  | 40.22               | <0.001  |                     |         | 0.042               | <0.001  | 0.0253              | <0.001  | 0.0144              | <0.001  |                     |         |
| CSP4 |                     |         |                     |         | 26.92               | 0.0208  | 0.147               | 0.02438 | 0.1                 | 0.00657 |                     |         |                     |         |
| CSP5 |                     |         |                     |         | 35.49               | <0.001  | 0.0757              | 0.0029  |                     |         |                     |         |                     |         |
| CSP6 |                     |         |                     |         |                     |         |                     |         |                     |         |                     |         |                     |         |

Statistics and mean ddCT values used in Figure 1a

**Tiassale post-exposure**

|      | 30 minutes          |         | 1 hour              |         | 2 hours             |         | 4 hours             |         | 24 hours            |         | 48 hours            |         |
|------|---------------------|---------|---------------------|---------|---------------------|---------|---------------------|---------|---------------------|---------|---------------------|---------|
|      | $\Delta\Delta ct_x$ | p-value |
| SAP1 |                     |         | 0.298               | 0.0251  |                     |         |                     |         |                     |         | 0.263               | 0.0121  |
| SAP2 |                     |         |                     |         | 2.35                | 0.03913 | 11.32               | <0.001  | 5.66                | <0.001  | 2.98                | 0.00879 |
| SAP3 |                     |         |                     |         |                     |         | 5.25                | <0.001  | 4.42                | 0.0028  |                     |         |
| CSP1 |                     |         |                     |         |                     |         |                     |         |                     |         |                     |         |
| CSP3 |                     |         |                     |         |                     |         |                     |         | 5.83                | 0.00213 | 6.96                | 0.00102 |
| CSP4 |                     |         |                     |         |                     |         |                     |         |                     |         | 0.213               | 0.0163  |
| CSP5 | 0.208               | 0.0217  | 0.169               | 0.0016  | 0.525               | 0.0013  |                     |         |                     |         | 17.16               | 0.0055  |
| CSP6 |                     |         | 12.75               | 0.0416  | 6.59                |         |                     | 0.0055  | 16.622              | 0.0077  |                     |         |

Statistics and mean ddCT values used in Figure 1b; Extended Data 3a.

**SAP2**

| Mortality          |              |          |
|--------------------|--------------|----------|
| Change             |              | p-value  |
| Deltamethrin       | 11.7% to 79% | 2.03E-05 |
| Permethrin         | 5.2% to 24.7 | 1.51E-03 |
| Alpha-cypermethrin | 2.8% to 10.8 | 7.72E-02 |
| Banfora Delt       | 13.19% to 44 | 2.19E-02 |

**CSP6**

| Mortality    |              |          |
|--------------|--------------|----------|
| Change       |              | p-value  |
| Deltamethrin | 11.7% to 31. | 4.74E-02 |

**Transgenics**

| Mortality  |              |          |
|------------|--------------|----------|
| Change     |              | p-value  |
| Permethrin | 84.3% to 67. | 2.29E-02 |

Statistics and mean mortality values used in Figure 2a; Extended Data Figure 5 and Figure 2b.

**Supplementary Table 3: Primer List.** Primers used for both synthesis of dsRNA constructs and qPCR.

**RNAi Primers**

| <b>ID</b> | <b>Forward</b>                             | <b>Reverse</b>                              |
|-----------|--------------------------------------------|---------------------------------------------|
| dsSAP2    | taatacgactcactatagggTTCTCGTTCCGGTTGCTTCA   | taatacgactcactatagggTAGTAGACCCCATCCCCACTT   |
| dsSAP3    | taatacgactcactatagggATGAAATTCCTCGTCGTTGTCG | taatacgactcactatagggTTCTCCGGGTCGTACTTCTTCT  |
| dsCSP4    | taatacgactcactatagggTGTAGCCCTTCTGACGGTTT   | taatacgactcactatagggTTCTCCAGCACGCACATGAT    |
| dsCSP6    | taatacgactcactatagggGCACAGCACAGCAACCTTTT   | taatacgactcactatagggTCCCCCTTTCAGCCAGCAT     |
| dsGFP     | taatacgactcactatagggAGAACGTAACGGCCACAAGTTC | taatacgactcactatagggAGACTTGACAGCTCGTCCATGCC |

**qPCR Primers**

| <b>ID</b> | <b>Forward</b>            | <b>Reverse</b>         |
|-----------|---------------------------|------------------------|
| SAP1      | ACGTCAACACAGAACGATCAAC    | TTGCTGGTGACTTATCCTGGG  |
| SAP2      | GCAGCTTGAGAGCGTCTTCT      | GAAAGCGATGGCGACGAACA   |
| SAP3      | AGTGTAGCGAGAAGCAGAAGAG    | GCGGTACTTGTTGACGTAGATG |
| CSP1      | AGCCTTTTCGTGCTTGTTC       | CGGTACGCTGTCTAGATTACT  |
| CSP3      | AACCTACGTCACCAAGTACGAT    | ATCGGGAAGGTGTCTTTCAGC  |
| CSP4      | GCTATCAGCGGCAGTTATTGTG    | AGCCGGTTAATATTCTGGCTGT |
| CSP5      | GCACGGACTCTACAGTACAA      | TCGGGCAGAATACGTTTCAGAT |
| CSP6      | GACAGTTTCGTTCTGTGCCG      | CCTTGCCAGTGGTCTTTTGC   |
| S7        | AGAACCAGCAGACCACATC       | GCTGCCAACTTCGGCTATTC   |
| EF        | GGCAAGAGGCATAACGATCAATGCC | GTCCATCTGCGACGCTCCGG   |
